# Supplementary material
Source: MDPI journal article supplement (https://www.mdpi.com/1424-2818/13/6/275)
Supplement: s1 [file s1]

## Supplementary Material

### Article

# The effect of climate and human pressures on functional diversity and species richness patterns of amphibians, reptiles and mammals in Europe

Mariana A. Tsianou <sup>1,\*</sup>, Maria Lazarina<sup>1</sup>, Danai-Eleni Michailidou<sup>1</sup>, Aristi Andrikou-Charitidou<sup>1</sup>, Athanasios S. Kallimanis<sup>1</sup>

<sup>1</sup>Department of Ecology, School of Biology, Aristotle University of Thessaloniki, GR-54124 Thessaloniki, Greece

\* Correspondence: [mtsianou@bio.auth.gr](mailto:mtsianou@bio.auth.gr)

**Table S1.** Sources used to collate functional traits for amphibians, reptiles and mammals of Europe

| Source                                                                                                                               | Type of Source |
|--------------------------------------------------------------------------------------------------------------------------------------|----------------|
| Alderton, D. 1996. Rodents of the World. New York, NY: Facts On File, Inc..                                                          | Book           |
| Altringham, J. 1996. Bats Biology and Behavior. New York: Oxford University Press.                                                   | Book           |
| Alves, P., Ferrand, N., Hacklander, K. (eds.) Lagomorph Biology: Evolution, ecology, and conservation. Netherlands, Springer.        | Book           |
| AmphibiaWeb – AmphibiaWeb: Information on amphibian biology and conservation. <a href="http://amphibiaweb.org">amphibiaweb.org</a> . | Website        |
| Animal Diversity Web (On-line). Accessed March 12, 2021 at <a href="https://animaldiversity.org">https://animaldiversity.org</a>     | Website        |
| Arnold, N. 2005. Collins Field Guide to the Reptiles and Amphibians of Britain and Europe, Harper Collins, London                    | Book           |
| Blair, W. F. 1972. Evolution in the Genus Bufo. University of Texas Press, Louisiana                                                 | Book           |
| Burnie, D., Wilson, D. 2005. Animal. Hong Kong, China: L.Rex Printing Ltd.                                                           | Book           |
| Burt, W., Grossenheider, R. 1980. Peterson Field Guides: Mammals, 3rd edition. Boston, MA: Houghton Mifflin Company.                 | Book           |
| Burton, R. 2002. International Wildlife Encyclopedia. Marshall Cavendish Corporation, New York.                                      | Book           |
| Corbet, G., Harris, S. 1991. The Handbook of British Mammals. Oxford: Blackwell Scientific Publications.                             | Book           |
| Csorba, G., Ujhelyi, P., Thomas, N. 2003. Horseshoe Bats of the World. Shropshire: Alana Books.                                      | Book           |
| Duellman, W.E., Trueb, L.S. 1994. Biology of Amphibians. The Johns Hopkins University Press, Baltimore                               | Book           |

|                                                                                                                                                                                                                                                                                                                     |                 |
|---------------------------------------------------------------------------------------------------------------------------------------------------------------------------------------------------------------------------------------------------------------------------------------------------------------------|-----------------|
| Enciclopedia Virtual de los Vertebrados Españoles. Museo Nacional de Ciencias Naturales, Madrid. Available from <a href="http://www.vertebradosibericos.org/">http://www.vertebradosibericos.org/</a>                                                                                                               | Website         |
| Geist, V. 1998. Deer of the world: their evolution, behavior, and ecology. Mechanicsburg, PA: Stackpole Books.                                                                                                                                                                                                      | Book            |
| Grzimek, B. (Ed.) 1990. Grzimek's Encyclopedia of Mammals. McGraw-Hill, New York.                                                                                                                                                                                                                                   | Book            |
| Guarino, F.M., Caputa, V., Angelini, F. 1992. The reproductive cycle of the newt <i>Triturus italicus</i> . <i>Amphibia-Reptilia</i> 13:121-133                                                                                                                                                                     | Published Paper |
| IUCN 2021 Red List (On-line). Accessed February 04, 2021 at <a href="https://www.iucnredlist.org">https://www.iucnredlist.org</a>                                                                                                                                                                                   | Website         |
| Jones, K.E. et al. 2009. PanTHERIA: a species-level database of life history, ecology, and geography of extant and recently extinct mammals. <i>Ecology</i> 90, 2648. (doi:10.1890/08-1494.1)                                                                                                                       | Published Paper |
| Kunz, T., M. Fenton. 2003. Bat Ecology. Chicago and London: The University Chicago Press.                                                                                                                                                                                                                           | Book            |
| Kyriakopoulou-Sklavounou, P., Loumbourdis, N. 1990. Annual ovarian cycle in the frog <i>Rana ridibunda</i> in Northern Greece. <i>Journal of Herpetology</i> 24:185-191                                                                                                                                             | Published Paper |
| Leen, N. 1969. The World of Bats. New York: Holt, Rhinehart and Winston.                                                                                                                                                                                                                                            | Book            |
| Long, J.L. 2003. Introduced Mammals of the World: Their History, Distribution and Influence. CSIRO Publishing, Collingwood, Australia.                                                                                                                                                                              | Book            |
| Macdonald, D. 1984. The Encyclopedia of Mammals. New York: Facts on File, Inc..                                                                                                                                                                                                                                     | Book            |
| Macdonald, D. 2009. The Princeton Encyclopedia of Mammals, Vol. 1, 1st. Edition. Princeton, New Jersey: Princeton University Press.                                                                                                                                                                                 | Book            |
| Malmgren, J.C., Thollesson, M. (1999) Sexual size and shape dimorphism in two species of newts, <i>Triturus cristatus</i> and <i>T. vulgaris</i> (Caudata: Salamandridae). <i>Journal of Zoology</i> 249:127-136                                                                                                    | Published Paper |
| Myhrvold, N.P., Baldrige, E., Chan, B., Sivam, D., Freeman, D.L. and Ernest, S.K.M. (2015), An amniote life-history database to perform comparative analyses with birds, mammals, and reptiles. <i>Ecology</i> , 96: 3109-3109. <a href="https://doi.org/10.1890/15-0846R.1">https://doi.org/10.1890/15-0846R.1</a> | Published Paper |
| Neuweiler, G. 2000. The Biology of Bats. New York and Oxford: Oxford University Press.                                                                                                                                                                                                                              | Book            |
| Nowak, R. 1999. Walker's Mammals of the World, Sixth Edition. Baltimore and London: The Johns Hopkins University Press.                                                                                                                                                                                             | Book            |
| Pough, F. H. et al. (1998). Herpetology. Prentice Hall, Upper Saddle River, New Jersey                                                                                                                                                                                                                              | Book            |
| Schober, W., Grimmberger, E. 1997. The Bats of Europe and North America. Neptune City, NJ: TFH Publications.                                                                                                                                                                                                        | Book            |
| Smith, A.T., Xie, Y. 2008. A Guide to the Mammals of China. Princeton University Press, New Jersey.                                                                                                                                                                                                                 | Book            |
| Trochet, A. et al. 2014. A database of life-history traits of European amphibians. <i>Biodiversity Data Journal</i> 2: e4123.                                                                                                                                                                                       | Published Paper |
| Tsiora, A., Kyriakopoulou-Sklavounou, P. 2002. Female reproductive cycle of the water frog <i>Rana epeirotica</i> in northwestern Greece. <i>Amphibia-Reptilia</i> 23:269-280                                                                                                                                       | Published Paper |

|                                                                                                                                                                                                                                                                                                    |                 |
|----------------------------------------------------------------------------------------------------------------------------------------------------------------------------------------------------------------------------------------------------------------------------------------------------|-----------------|
| Wilman, H., Belmaker, J., Simpson, J., de la Rosa, C., Rivadeneira, M.M. and Jetz, W. 2014. EltonTraits 1.0: Species-level foraging attributes of the world's birds and mammals. <i>Ecology</i> , 95: 2027-2027. <a href="https://doi.org/10.1890/13-1917.1">https://doi.org/10.1890/13-1917.1</a> | Published Paper |
| Wilson, D. 1993. <i>Mammal Species of the World</i> . Washington, USA: Smithsonian Institute.                                                                                                                                                                                                      | Book            |
| Wilson, D. 1997. <i>Bats in Question</i> . Washington: Smithsonian Institution Press.                                                                                                                                                                                                              | Book            |
| Zug, G.R., Vitt, L.J., Caldwell, J.P. 2001. <i>Herpetology, An Introductory Biology of Amphibians and Reptiles</i> . Academic Press, San Diego, California                                                                                                                                         | Book            |

---
